# Supplementary material for: 3D scandium and yttrium arenedisulfonate MOF materials as highly thermally stable bifunctional heterogeneous catalysts
Source: Royal Society of Chemistry journal article supplement (doi:10.1039/b902954k), 2009-01-01

## 3D scandium and yttrium arenedisulfonate MOF materials as high thermally stable bifunctional heterogeneous catalysts

Josefina Perles<sup>a</sup>, Natalia Snejko<sup>b</sup>, Marta Iglesias<sup>c</sup> and M. Ángeles Monge<sup>d\*</sup>

Supplementary Information:

Experimental and calculated X-Ray powder patterns for **RPF-12**, **RPF-13** and **RPF-14**

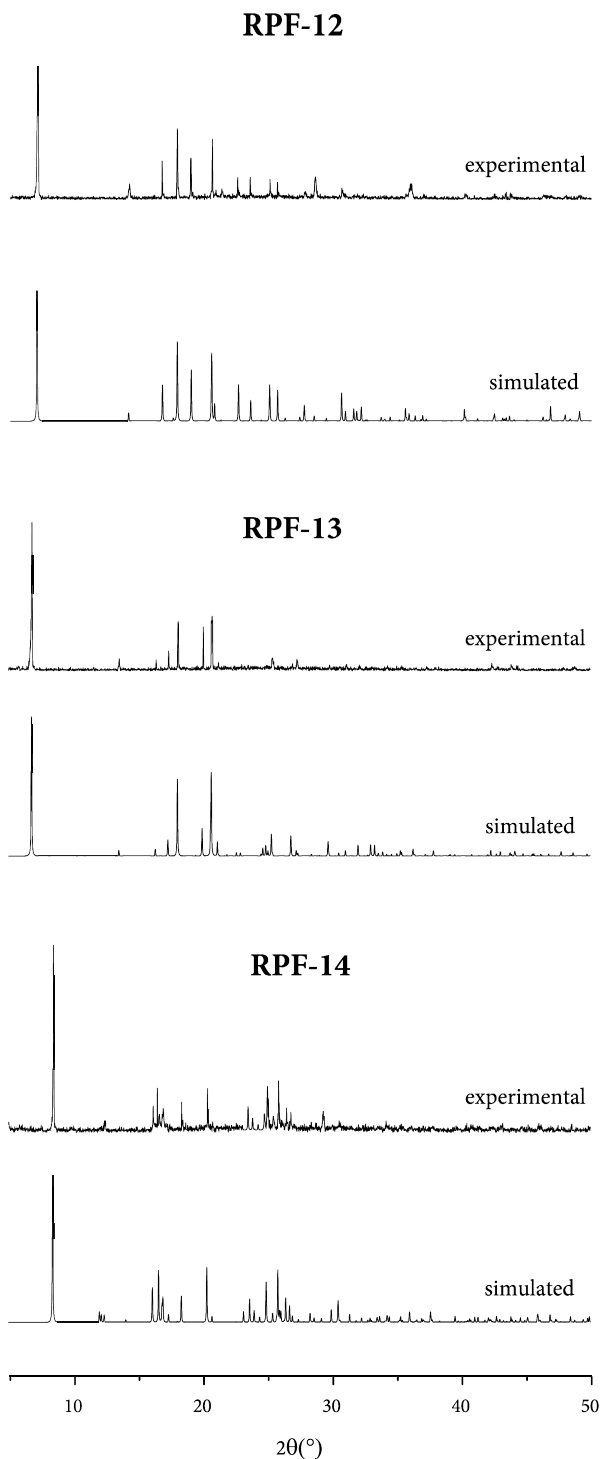

IR spectra of **RPF-12**, **RPF-13** and **RPF-14**

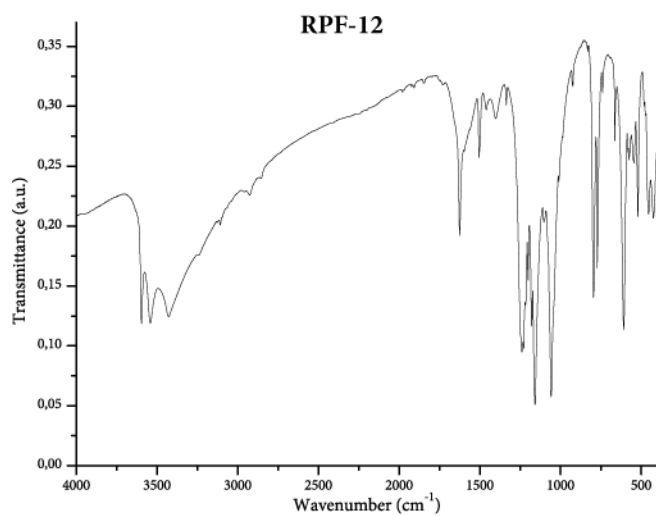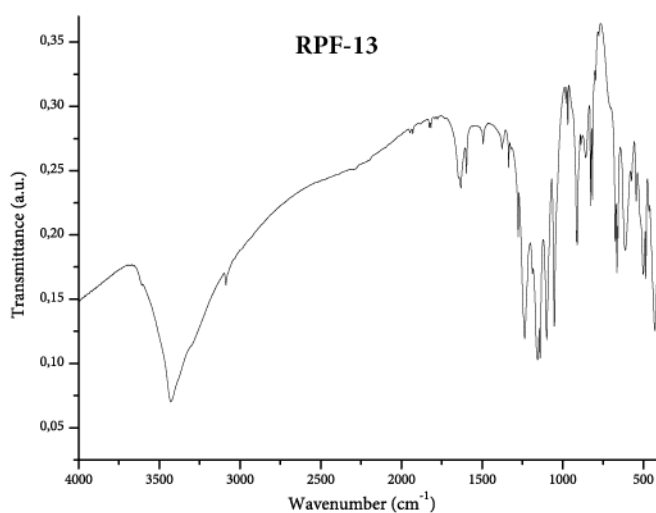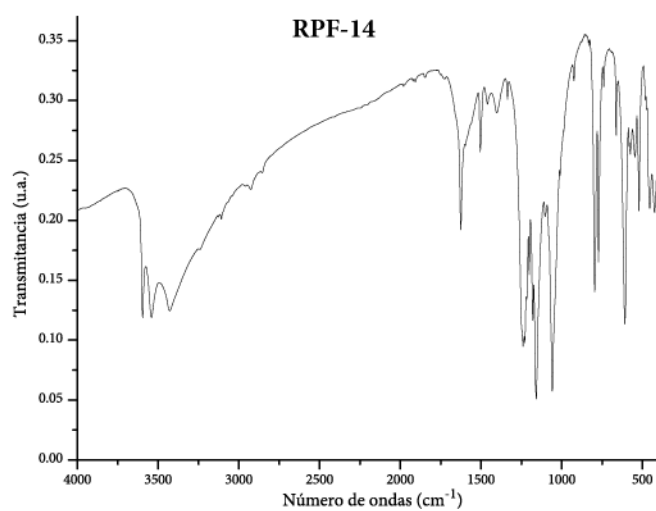

Supplement: b902954k.pdf [file b902954k.pdf]
